# Supplementary material for: Reversible non-volatile electronic switching in a near-room-temperature van der Waals ferromagnet
Source: PubMed Central journal article supplement (PMC10978849; doi:10.1038/s41467-024-46862-z), 2024-03-28
Supplement: 41467_2024_46862_MOESM2_ESM.pdf [file 41467_2024_46862_MOESM2_ESM.pdf]

## Peer Review File

---

Reversible non-volatile electronic switching in a near-room-temperature van der Waals ferromagnet

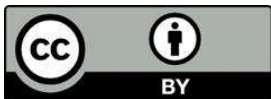

**Open Access** This file is licensed under a Creative Commons Attribution 4.0

International License, which permits use, sharing, adaptation, distribution and reproduction in any medium or format, as long as you give appropriate credit to

the original author(s) and the source, provide a link to the Creative Commons license, and indicate if changes were made. In the cases where the authors are anonymous, such as is the case for the reports of anonymous peer reviewers, author attribution should be to 'Anonymous Referee' followed by a clear attribution to the source work. The images or other third party material in this file are included in the article's Creative Commons license, unless indicated otherwise in a credit line to the material. If material is not included in the article's Creative Commons license and your intended use is not permitted by statutory regulation or exceeds the permitted use, you will need to obtain permission directly from the copyright holder. To view a copy of this license, visit <http://creativecommons.org/licenses/by/4.0/>.

Editorial Note: This manuscript has been previously reviewed at another journal that is not operating a transparent peer review scheme. This document only contains reviewer comments and rebuttal letters for versions considered at Nature Communications.

Reviewers' Comments:

Reviewer #1:

Remarks to the Author:

I have read the revised manuscript and the response to referees. My main criticisms upon the last review regarded the case for the impact of the manuscript. The manuscript has not been edited in response to my previous comments as far as I can see, so there is little for me to say.

I am partially swayed by the arguments in the rebuttal letter for the prospects of the field moving forward, and I expect that the paper will have some impact. I think the scientific aspects are well presented and I have no further comments. The paper should be published in some venue. If the editor feels Nature Comms is appropriate given the other reports, I do not object.

Reviewer #2:

Remarks to the Author:

In this manuscript, the authors report a non-volatile method to reversibly toggle between two distinct states in van der Waals ferromagnet  $\text{Fe}_5\text{GeTe}_2$ , the experimental data are convincing and interesting, especially, they directly observed the topological nodal line in a crystalline system with disorder in the site-disordered phases for the first time. I think it is acceptable to publish the results in Nature Communication.
